# Supplementary material for: Hepatic Stearoyl-CoA desaturase-1 deficiency-mediated activation of mTORC1- PGC-1α axis regulates ER stress during high-carbohydrate feeding
Source: PubMed Central journal article supplement (PMC6823547; doi:10.1038/s41598-019-52339-7), 2019-10-31

**Hepatic Stearoyl-CoA desaturase-1 deficiency-mediated activation of mTORC1- PGC-1 $\alpha$  axis  
regulates ER stress during high-carbohydrate feeding**

Ahmed AlJohani, Mohammad Imran Khan, Deeba N. Syed, Bonneville Abram, Sarah Lewis, Lucas  
O'neill, Hasan Mukhtar, James M. Ntambi

S1

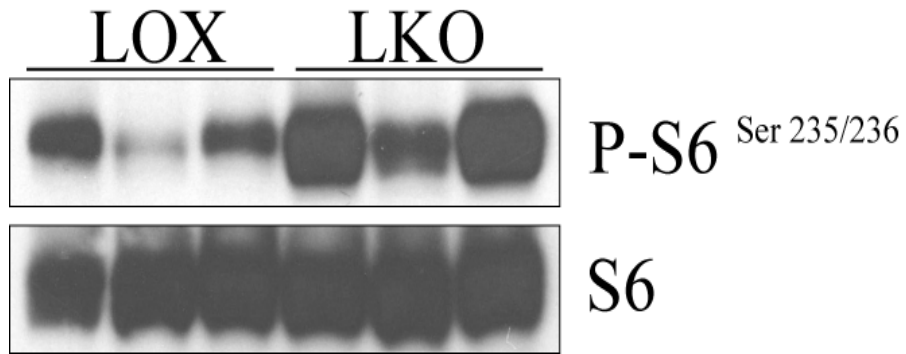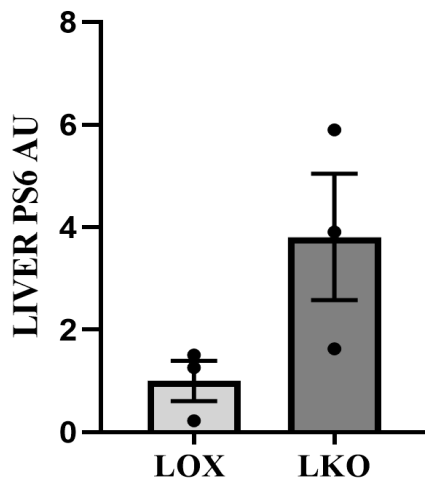

S2

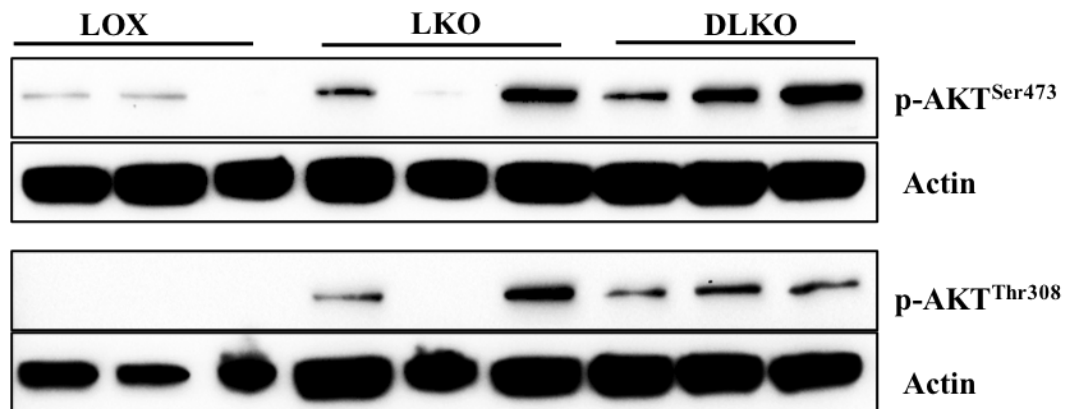

Supplement: 41598_2019_52339_MOESM1_ESM.pdf [file 41598_2019_52339_MOESM1_ESM.pdf]
